# Supplementary material for: Assessing Healthcare Workers’ Knowledge and Their Confidence in the Diagnosis and Management of Human Monkeypox: A Cross-Sectional Study in a Middle Eastern Country
Source: MDPI journal article supplement (doi:10.3390/healthcare10091722), 2022-09-08
Supplement: s1 [file s1]

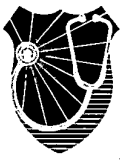

كلية الطب

SCHOOL OF MEDICINE

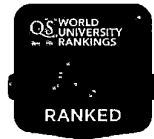

الجامعة الأردنية

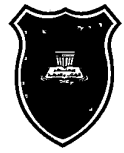

THE UNIVERSITY OF JORDAN

الرقم: 2544/2022/67  
التاريخ: 2022/5/31

### السادة رؤساء الأقسام المعنية

الموضوع: تنسيقات لجنة البحث العلمي (13) - بخصوص الأبحاث (غير المدعومة

تحية طيبة وبعد،،

فقد ناقشت لجنة البحث العلمي في الكلية في جلستها رقم (13/2021-2022) المنعقدة بتاريخ 2022/5/24، عدداً من الأبحاث (غير المدعومة)، وقد نسبت اللجنة بالموافقة على تسجيل الأبحاث كالتالي:

#### قسم الجراحة الخاصة

1- البحث المقدم من د. طارق محافظة بعنوان:

Is routine preoperative coagulation study necessary? An audit conducted at a tertiary teaching hospital

1- البحث المقدم من د. المغنر غرايبة بعنوان:

Oil Based Solid Ascorbic Acid as a Novel Formulation For Corneal Epithelial Regeneration

شريطة أخذ موافقة IRB، حيث إنها دراسة تدخلية.

#### قسم الجراحة العامة

1- البحث المقدم من د. محمد الرشدان بعنوان:

Mesh fixation techniques in TAPP : Fibrin glue vs. tackers , a randomized controlled trial

#### قسم الأمراض الباطنية

1- البحث المقدم من د. حسام الحوري بعنوان:

Comparison of Outcome of American thyroid association (ATA) Low-risk Differentiated Thyroid Cancer (DTC) Treated with low vs high administered Iodine-131 Activity

2- البحث المقدم من د. خالد عويدات بعنوان:

Comparing Positional and Non-Positional Obstructive Sleep Apnea patients among Jordanian Population

3- البحث المقدم من د. مروان العدوان بعنوان:

Patient satisfaction in SLE treatment: A single center study

#### قسم طب الأطفال

1- البحث المقدم من أ.د. أميرة المصري بعنوان:

Genetic etiologies underlying developmental epileptic encephalopathies in children

#### قسم النسائية والتوليد

1- البحث المقدم من د. ناصر الحسين بعنوان:

Are females who consume heavily processed meat and hydrogenated fats more prone to laparoscopy-diagnosed endometriosis than others?

2- البحث المقدم من د. عقبة القرعان بعنوان:

Histopathologic findings among patients who underwent hysterectomy, a case-series.

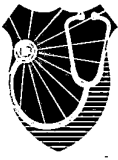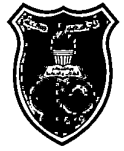

قسم علم الأمراض والأحياء الدقيقة والطب الشرعي

1- الأبحاث المقدمة من د. مالك سلام بعنوان:

- 1- Levels of knowledge of human monkeypox viral infection among Jordanian healthcare workers and its relation to conspiracy explanations regarding emerging virus infections.
- 2- Levels of knowledge of human monkeypox viral infection among the general public in Jordan its relation to conspiracy explanations regarding emerging virus infections.
- 3- Levels of knowledge of human monkeypox viral infection among the students in health faculties/schools in Jordan its relation to conspiracy explanations regarding emerging virus infections.

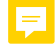

وتفضلوا بقبول فائق الاحترام،،،

عميد كلية الطب

الأستاذ الدكتور ياسر ريان

- ملاحظة: يرجى من الأقسام المذكورة تزويد الباحث الرئيس بنسخة من هذه الموافقة، ليقوم بتحميل ما يلي على موقع الأبحاث العلمية في المستشفى:

[http://apphosp.ju.edu.jo/scientific\\_research](http://apphosp.ju.edu.jo/scientific_research)

(نسخة من هذا الكتاب & نموذج البحث معاً حسب الأصول (في حال احتياج لموافقة لجنة IRB بالمستشفى) & أي مرفقات للبحث، كالاستبيان، وغيره).

- نسخة: الباحثين.
- نسخة: أمانة سر اللجنة.
